# Supplementary material
Source: HighWire-hosted journal article supplement (https://gh.bmj.com/content/7/4/e008110)

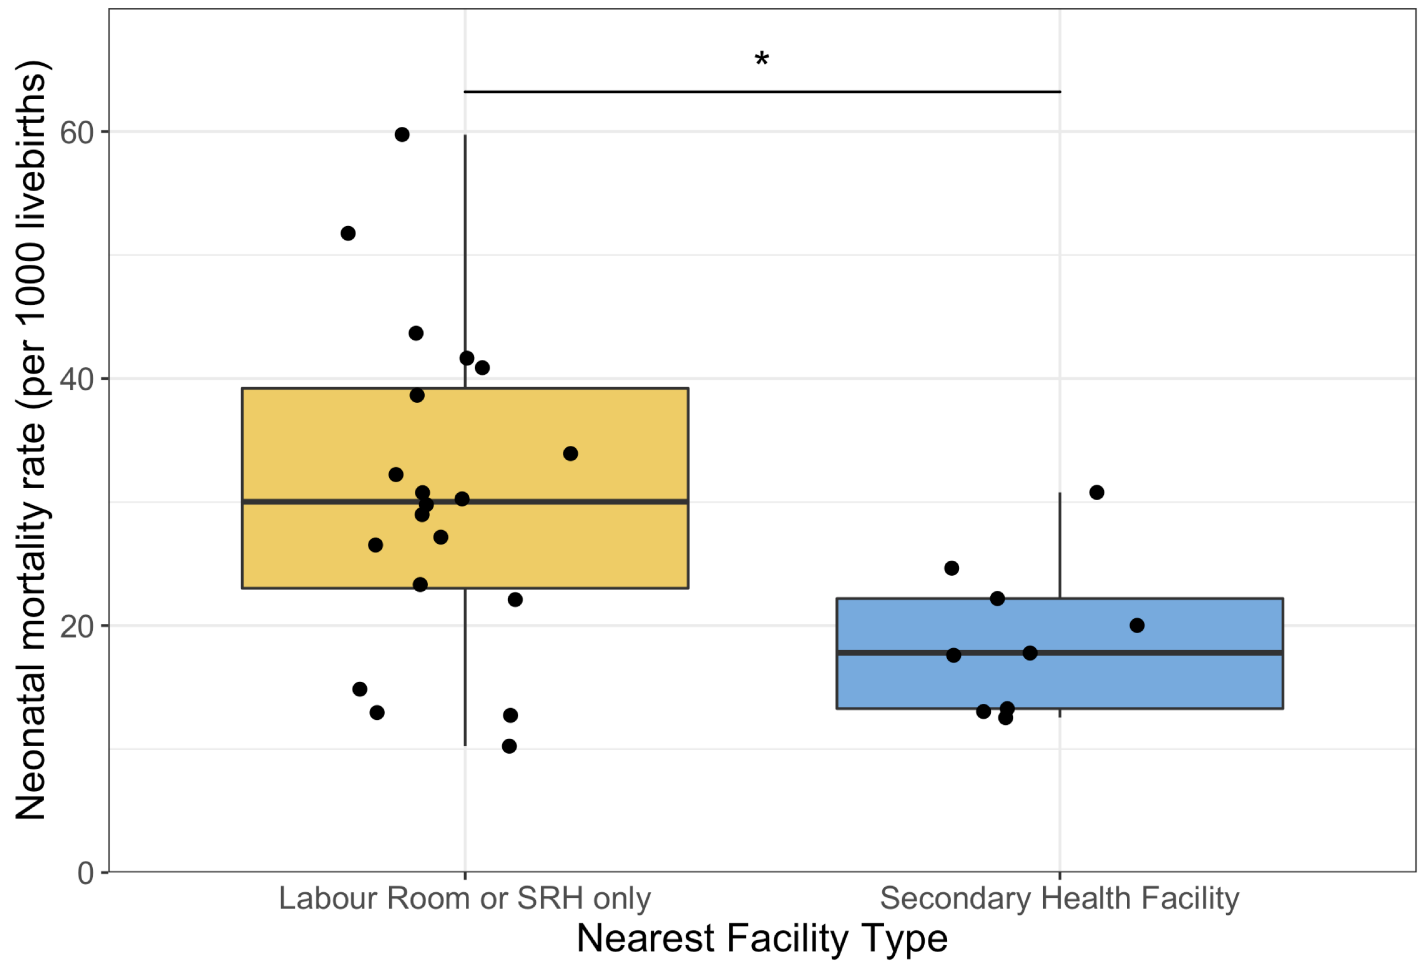

Supplement: inline-supplementary-material-3 [file inline-supplementary-material-3.pdf]
